# Supplementary material
Source: publisher figshare collection journal article supplement (https://tandf.figshare.com/articles/dataset/_/1241577)
Supplement: Supplementary file 1 [file 2]

# A Cluster-Based Outlier Detection Scheme for Multivariate Data

## SUPPLEMENTAL TABLES

|          |                                            |
|----------|--------------------------------------------|
| $p = 1$  | $c_{n,p}^2 = 0.8045 + 9521.38 n^{-2.7647}$ |
| $p = 3$  | $c_{n,p}^2 = 0.6835 + 23.57 n^{-0.8718}$   |
| $p = 5$  | $c_{n,p}^2 = 0.7532 + 37.51 n^{-0.9834}$   |
| $p = 10$ | $c_{n,p}^2 = 1.3627 + 8096.03 n^{-2.0556}$ |
| $p = 15$ | $c_{n,p}^2 = 1.7921 + 869.70 n^{-1.3223}$  |

Table 1: Scaling factor  $c_{n,p}^2$ .

|          | $n = 40$ | $n = 60$ | $n = 90$ | $n = 125$ | $n = 200$ | $n = 400$ |
|----------|----------|----------|----------|-----------|-----------|-----------|
| $p = 5$  | 1.0305   | 1.0407   | 1.0505   | 1.0533    | 1.0622    | 1.0760    |
| $p = 10$ | 1.0067   | 1.0168   | 1.0328   | 1.0609    | 1.0742    | 1.0609    |
| $p = 15$ | 1.0072   | 1.0065   | 1.0141   | 1.0188    | 1.0339    | 1.0546    |

Table 2: Estimated bias correction factor  $c_{\text{FSRMCD-MAC}}$ .

|          | Test             | $n = 40$ | $n = 60$ | $n = 90$ | $n = 125$ | $n = 200$ | $n = 400$ |
|----------|------------------|----------|----------|----------|-----------|-----------|-----------|
| $p = 5$  | $L_{1,1-\gamma}$ | 38.0688  | 33.8628  | 32.2079  | 31.6375   | 31.9250   | 34.0813   |
|          | $L_{2,1-\gamma}$ | 12.6183  | 18.1691  | 17.2121  | 16.9202   | 16.9710   | 16.7308   |
| $p = 10$ | $L_{1,1-\gamma}$ | 57.4584  | 50.6179  | 49.3184  | 49.2372   | 46.3510   | 45.4414   |
|          | $L_{2,1-\gamma}$ | 16.3012  | 18.9328  | 28.1964  | 28.3989   | 26.9379   | 25.9930   |
| $p = 15$ | $L_{1,1-\gamma}$ | 91.2651  | 73.6918  | 66.0155  | 59.7126   | 57.2154   | 56.4280   |
|          | $L_{2,1-\gamma}$ | 20.2242  | 24.3280  | 27.5406  | 37.2353   | 34.7012   | 34.0299   |

Table 3:  $L_{1,1-\gamma_{\text{actual}}}$ ,  $L_{2,1-\gamma_{\text{actual}}}$  for FSRMCD-MAC when  $\gamma_{\text{nominal}} = 0.01$  for IRMCD.

|          |                            | $n = 40$ | $n = 60$ | $n = 90$ | $n = 125$ | $n = 200$ | $n = 400$ |
|----------|----------------------------|----------|----------|----------|-----------|-----------|-----------|
| $p = 5$  | mult <sub>IRMCD</sub>      | 0.5765   | 0.2807   | 0.2248   | 0.2015    | 0.1569    | 0.1778    |
|          | mult <sub>FSRMCD-MAC</sub> | 0.6554   | 0.3381   | 0.3255   | 0.3377    | 0.2952    | 0.3926    |
| $p = 10$ | mult <sub>IRMCD</sub>      | 2.4551   | 0.8678   | 0.6979   | 0.6456    | 0.5820    | 0.2783    |
|          | mult <sub>FSRMCD-MAC</sub> | 4.7270   | 1.1209   | 0.9817   | 1.0011    | 1.1025    | 0.7860    |
| $p = 15$ | mult <sub>IRMCD</sub>      | 2.5548   | 2.0139   | 1.0635   | 1.4505    | 1.2822    | 0.9517    |
|          | mult <sub>FSRMCD-MAC</sub> | 4.3466   | 3.3069   | 1.7381   | 1.8549    | 2.2975    | 3.9149    |

Table 4: Critical mult values.
